# Supplementary material for: Intensive Adoption as a Management Strategy for Unowned, Urban Cats: A Case Study of 25 Years of Trap–Assess–Resolve (TAR) in Auckland, New Zealand
Source: MDPI journal article supplement (doi:10.3390/ani12172301), 2022-09-05
Supplement: s1 [file s1]

Table S1 Examples of reporting forms used by Lonely Miaow over the years to assess the health and temperament of trapped cats. An interviews on procedures used in trapping and assessment is available at:  
<https://www.radionz.co.nz/search/results?utf8=%E2%9C%93&q=Spectrum+6+June+1999&commit=Search>.

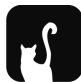

## THE LONELY MIAOW

ASSOCIATION INC.

### VETERINARY ADMITTANCE FORM

ID number: \_\_\_\_\_ Contact person: \_\_\_\_\_  
Name: \_\_\_\_\_ Contact phone: \_\_\_\_\_  
Colour: \_\_\_\_\_ Authorisation: \_\_\_\_\_  
Sex: \_\_\_\_\_ Age: \_\_\_\_\_  
Suburb trapped: \_\_\_\_\_ Date trapped: \_\_\_\_\_  
Admission date: \_\_\_\_\_ Collection date: \_\_\_\_\_

Temperament assessment:      Wild              Rehomeable

Health check:              ☐      Ringworm  
                                 ☐      Eye infection  
                                 ☐      Other \_\_\_\_\_

Health action:              ☐      Worm                      ☐      Desex  
                                 ☐      Deflea                      ☐      Vaccinate  
                                 ☐      Euthanasia

Medical problems and treatment instructions: \_\_\_\_\_  
\_\_\_\_\_  
\_\_\_\_\_

Date discharged: \_\_\_\_\_ Veterinarian signature: \_\_\_\_\_

\*\*\*\* PLEASE ENTER ID NUMBER AND SEX ONTO INVOICE STATEMENT.
